# Supplementary material
Source: PubMed Central journal article supplement (PMC4111626)
Supplement: NIHMS573065-supplement-supplement_1.pdf [file NIHMS573065-supplement-supplement_1.pdf]

## Supplemental Material

**Table.** Online supplement presenting all candidate predictors assessed for disease progression. Mean±SD or Frequency (%) shown unless otherwise noted.

| Variable*                                                | n  | Stable disease<br>(n=99) | n  | Progressive<br>disease<br>(n=28) | p <sup>†</sup> |
|----------------------------------------------------------|----|--------------------------|----|----------------------------------|----------------|
| Median age at diagnosis of cardiomyopathy, years (IQR)   | 99 | 1.1 (0.3-10.2)           | 28 | 7.5 (0.9-13.5)                   | 0.04           |
| Median time from diagnosis to baseline echo, years (IQR) | 99 | 3.47 (0.56-6.84)         | 28 | 0.79 (0.27-2.97)                 | 0.01           |
| Median age at baseline echo, years (IQR)                 | 99 | 8.83 (4.00-15.05)        | 28 | 9.39 (3.62-14.76)                | 0.74           |
| Time between echos, years                                | 90 | 0.81±0.31                | 17 | 0.73±0.30                        | 0.31           |
| Male                                                     | 99 | 39 (39%)                 | 28 | 17 (61%)                         | 0.048          |
| Race                                                     | 99 |                          | 28 |                                  | 0.06           |
| White                                                    |    | 69 (70%)                 |    | 14 (50%)                         |                |
| Other or unknown race                                    |    | 30 (30%)                 |    | 14 (50%)                         |                |
| Hispanic or Latino ethnicity                             | 94 | 16 (17%)                 | 27 | 2 (7%)                           | 0.23           |
| Symptom duration >0 months                               | 98 | 15 (15%)                 | 28 | 5 (18%)                          | 0.74           |
| Primary cause of dilated cardiomyopathy                  | 99 |                          | 28 |                                  | 0.57           |
| Idiopathic                                               |    | 65 (66%)                 |    | 20 (71%)                         |                |
| Non-idiopathic                                           |    | 34 (34%)                 |    | 8 (29%)                          |                |
| Known or suspected familial cardiomyopathy               | 99 | 13 (13%)                 | 28 | 6 (21%)                          | 0.28           |

| Variable*                                                                    | n  | Stable disease<br>(n=99) | n  | Progressive<br>disease<br>(n=28) | P <sup>†</sup> |
|------------------------------------------------------------------------------|----|--------------------------|----|----------------------------------|----------------|
| Hospitalized in previous six months                                          | 99 | 26 (26%)                 | 28 | 15 (54%)                         | 0.008          |
| No. of hospitalizations related to heart failure                             | 99 |                          | 28 |                                  | 0.006          |
| 0                                                                            |    | 86 (87%)                 |    | 17 (61%)                         |                |
| 1                                                                            |    | 11 (11%)                 |    | 6 (21%)                          |                |
| 2                                                                            |    | 2 (2%)                   |    | 5 (18%)                          |                |
| Failure to thrive in 6 months prior to enrollment                            | 98 | 9 (9%)                   | 28 | 6 (21%)                          | 0.09           |
| Feeding difficulties in 6 months prior to enrollment                         | 99 | 11 (11%)                 | 28 | 4 (14%)                          | 0.53           |
| Dyspnea in 6 months prior to enrollment                                      | 99 | 11 (11%)                 | 27 | 12 (44%)                         | <0.001         |
| Feeding difficulties or exercise intolerance in 6 months prior to enrollment | 99 | 32 (32%)                 | 28 | 18 (64%)                         | 0.02           |
| Edema in 6 months prior to enrollment                                        | 99 | 9 (9%)                   | 28 | 3 (11%)                          | 0.80           |
| Syncope in 6 months prior to enrollment                                      | 98 | 5 (5%)                   | 26 | 2 (8%)                           | 0.61           |
| Palpitations in 6 months prior to enrollment                                 | 91 | 9 (10%)                  | 24 | 5 (21%)                          | 0.15           |
| Thrombo-embolic event in 6 months prior to enrollment                        | 99 | 1 (1%)                   | 28 | 1 (4%)                           | 0.37           |

| Variable*                                                         | n  | Stable disease<br>(n=99) | n  | Progressive<br>disease<br>(n=28) | P <sup>†</sup> |
|-------------------------------------------------------------------|----|--------------------------|----|----------------------------------|----------------|
| Other symptoms in 6 months prior to enrollment                    | 99 | 12 (12%)                 | 28 | 1 (4%)                           | 0.22           |
| Intravenous inotropic medications in 6 months prior to enrollment | 90 | 8 (9%)                   | 27 | 7 (26%)                          | 0.03           |
| Ventricular tachyarrhythmia                                       | 9  | 6 (67%)                  | 5  | 5 (100%)                         | 0.96           |
| Weight-for-age z-score                                            | 97 | 0.0±1.4                  | 28 | -0.2±1.8                         | 0.46           |
| Weight-for-age z-score                                            | 97 |                          | 28 |                                  | 0.21           |
| Z<-1                                                              |    | 25 (26%)                 |    | 11 (39%)                         |                |
| -1≤Z≤1                                                            |    | 53 (55%)                 |    | 10 (36%)                         |                |
| Z>1                                                               |    | 19 (20%)                 |    | 7 (25%)                          |                |
| Median body surface area, m <sup>2</sup> (IQR)                    | 99 | 0.9 (0.7-1.7)            | 28 | 1.1 (0.6-1.6)                    | 0.72           |
| Body surface area-for-age z-score                                 | 98 | 0.1±1.3                  | 28 | 0.2±1.9                          | 0.77           |
| End-diastolic short axis dimension, m-mode z-score                | 99 | 3.4±1.8                  | 26 | 7.4±3.7                          | <0.001         |
| End-diastolic short axis dimension, 2D z-score                    | 99 | 3.6±2.4                  | 27 | 7.8±4.3                          | <0.001         |
| Posterior wall thickness to dimension ratio, m-mode z-score       | 98 | -1.8±1.0                 | 27 | -2.6±1.0                         | <0.001         |

| Variable*                                               | n  | Stable disease<br>(n=99) | n  | Progressive<br>disease<br>(n=28) | P <sup>†</sup> |
|---------------------------------------------------------|----|--------------------------|----|----------------------------------|----------------|
| Posterior wall thickness to dimension ratio, 2D z-score | 99 | -1.5±1.2                 | 28 | -2.2±1.3                         | 0.007          |
| LV mass z-score m-mode                                  | 99 | 1.3±1.5                  | 26 | 3.2±2.2                          | <0.001         |
| LV mass z-score, 2D                                     | 98 | 1.9±1.7                  | 27 | 4.6±2.3                          | <0.001         |
| Mass to volume ratio z-score                            | 99 | -1.0±1.1                 | 28 | -1.7±1.2                         | 0.006          |
| Cardiac index, 2D, L/min/m <sup>2</sup>                 | 99 | 4.0±1.2                  | 28 | 4.1±1.4                          | 0.56           |
| Sphericity index z-score                                | 99 | 1.0±1.3                  | 28 | 2.0±1.4                          | 0.001          |
| Median eccentricity index (IQR)                         | 99 | 0.93 (0.92-0.94)         | 28 | 0.92 (0.90-0.93)                 | 0.003          |
| Shortening fraction, m-mode %                           | 99 | 21.7±6.4                 | 27 | 12.8±4.8                         | <0.001         |
| Median (IQR)                                            | 99 | 21.9 (18.0-27.0)         | 27 | 12.0 (8.7-16.7)                  |                |
| Shortening fraction, m-mode z-score                     | 99 | -6.1±3.9                 | 27 | -12.1±4.8                        | <0.001         |
| Shortening fraction, 2D %                               | 99 | 18.7±6.2                 | 28 | 11.6±5.3                         | <0.001         |
| Median (IQR)                                            | 99 | 18.6 (14.3-23.7)         | 28 | 11.7 (8.3-13.2)                  |                |
| Shortening fraction, 2D z-score                         | 99 | -5.1±1.9                 | 28 | -7.2±1.8                         | <0.001         |
| Aortic ejection time, m-mode, msec                      | 99 | 263.6±36.3               | 28 | 241.4±33.1                       | 0.006          |
| Heart rate / aortic ejection time, msec <sup>1/2</sup>  | 98 | 0.60±0.04                | 27 | 0.60±0.05                        | 0.99           |

| Variable*                                                | n  | Stable disease<br>(n=99) | n  | Progressive<br>disease<br>(n=28) | P <sup>†</sup> |
|----------------------------------------------------------|----|--------------------------|----|----------------------------------|----------------|
| Ejection fraction %                                      | 99 | 43.1±9.7                 | 28 | 27.9±11.4                        | <0.001         |
| Median (IQR)                                             | 99 | 44.0 (37.6-51.0)         | 28 | 27.1 (19.1-35.0)                 |                |
| Ejection fraction z-score                                | 99 | -4.3±2.1                 | 28 | -7.5±2.4                         | <0.001         |
| Mitral valve peak early velocity z-score*                | 69 | 0.3±1.1                  | 16 | -0.4±0.9                         | 0.03           |
| Mitral valve peak atrial velocity z-score*               | 69 | 0.3±1.2                  | 16 | 0.0±1.4                          | 0.31           |
| Mitral valve early velocity/Atrial velocity z-score*     | 69 | 0.0±1.1                  | 16 | -0.1±1.2                         | 0.83           |
| Median mitral regurgitation jet width/BSA <sup>0.5</sup> | 98 | 0.19 (0.00-0.29)         | 28 | 0.33 (0.21-0.46)                 | 0.001          |
| Severity of mitral valve regurgitation                   | 98 |                          | 28 |                                  | 0.004          |
| None                                                     |    | 33 (34%)                 |    | 3 (11%)                          |                |
| Mild                                                     |    | 44 (45%)                 |    | 9 (32%)                          |                |
| Moderate                                                 |    | 13 (13%)                 |    | 8 (29%)                          |                |
| Severe                                                   |    | 8 (8%)                   |    | 8 (29%)                          |                |
| Severity of mitral valve regurgitation                   | 98 |                          | 28 |                                  | <0.001         |
| Non/Mild                                                 |    | 77 (79%)                 |    | 12 (43%)                         |                |
| Moderate/Severe                                          |    | 21 (21%)                 |    | 16 (57%)                         |                |
| Tei Index                                                | 99 | 0.42±0.16                | 28 | 0.54±0.25                        | 0.005          |

| Variable*                                                                    | n  | Stable disease<br>(n=99) | n  | Progressive<br>disease<br>(n=28) | P <sup>†</sup> |
|------------------------------------------------------------------------------|----|--------------------------|----|----------------------------------|----------------|
| Left lateral AV valve peak early diastolic velocity z-score*                 | 86 | -1.3±1.5                 | 23 | -2.6±1.7                         | <0.001         |
| Left lateral AV valve peak atrial diastolic velocity z-score*                | 86 | -0.6±2.0                 | 23 | -1.1±0.9                         | 0.21           |
| Left lateral AV valve peak systolic velocity z-score                         | 99 | -1.2±1.4                 | 26 | -2.3±1.2                         | <0.001         |
| Septal AV valve peak early diastolic velocity z-score*                       | 79 | -1.9±1.2                 | 21 | -3.2±1.3                         | <0.001         |
| Septal AV valve peak atrial diastolic velocity z-score*                      | 79 | -0.5±0.9                 | 21 | -1.0±1.1                         | 0.03           |
| Septal AV valve peak systolic velocity z-score                               | 99 | -1.4±2.1                 | 27 | -3.1±2.2                         | <0.001         |
| Right lateral AV valve peak early diastolic velocity z-score*                | 67 | -0.5±1.1                 | 19 | -1.2±0.9                         | 0.02           |
| Right lateral AV valve peak atrial diastolic velocity z-score*               | 67 | -0.2±1.0                 | 19 | 0.3±1.5                          | 0.15           |
| Right lateral AV valve peak systolic velocity right lateral AV valve z-score | 98 | -0.2±1.4                 | 26 | -1.1±1.4                         | 0.002          |
| Mitral valve average E/E' z-score*                                           | 67 | 2.2±3.4                  | 15 | 6.5±7.0                          | 0.004          |

| Variable*                                          | n  | Stable disease<br>(n=99) | n  | Progressive<br>disease<br>(n=28) | P <sup>†</sup> |
|----------------------------------------------------|----|--------------------------|----|----------------------------------|----------------|
| Left ventricular flow propagation velocity z-score | 94 | -0.3±0.9                 | 28 | -0.7±0.5                         | 0.03           |
| Mitral valve left lateral E/E' z-score*            | 69 | 2.2±3.3                  | 15 | 7.4±8.0                          | 0.002          |
| Mitral valve septal E/E' z-score*                  | 67 | 3.4±4.4                  | 15 | 6.8±6.5                          | 0.03           |

\* Doppler variables which were only measurable in the absence of a summation wave were not considered for the stepwise multivariable model

All echocardiographic measures are from the left ventricle, where applicable.

†P value is from logistic regression comparing stable disease to significant disease progression.

AV=atrioventricular, IQR = interquartile range, echos=echocardiograms, LV=left ventricular
